# Supplementary material for: The role of nanoscale defect features in enhancing the thermoelectric performance of p-type nanostructured SiGe alloys
Source: Royal Society of Chemistry journal article supplement (doi:10.1039/c5nr01786f), 2015-01-01
Supplement: c5nr01786f1.pdf [file c5nr01786f1.pdf]

**Electronic Supporting Information (ESI):**

**Role of nanoscale defect features in enhancing the thermoelectric performance of p-type nanostructured SiGe alloys**

Sivaiah Bathula,<sup>1,2</sup> M. Jayasimhadri<sup>2</sup>, Bhasker Gahtori<sup>1</sup>, Niraj Kumar Singh<sup>1</sup>, Kriti Tyagi<sup>1,3</sup>, A. K. Srivastava<sup>1</sup> and Ajay Dhar<sup>1,\*</sup>

<sup>1</sup>*CSIR-Network of Institutes for Solar Energy, CSIR-National Physical Laboratory, Dr. K. S. Krishnan Road, New Delhi -110012, India*

<sup>2</sup>*Department of Applied Physics, Delhi Technological University, Delhi, India*

<sup>3</sup>*Academy of Scientific and Innovative Research (AcSIR), CSIR-National Physical laboratory (NPL) Campus, New Delhi, India*

This supporting information includes:

1. HRTEM analysis of nanostructured SiGe alloy
2. The temperature dependence of thermal conductivity ( $\kappa$ ), calculated from the measured thermal diffusivity and specific heat capacity.
3. Temperature dependence electrical transport properties of nanostructured SiGe for different consecutive thermal cycles.

---

\*Corresponding author: [adhar@nplindia.org](mailto:adhar@nplindia.org)

Tel.: +91 11 4560 9456; Fax: +91 11 4560 9310

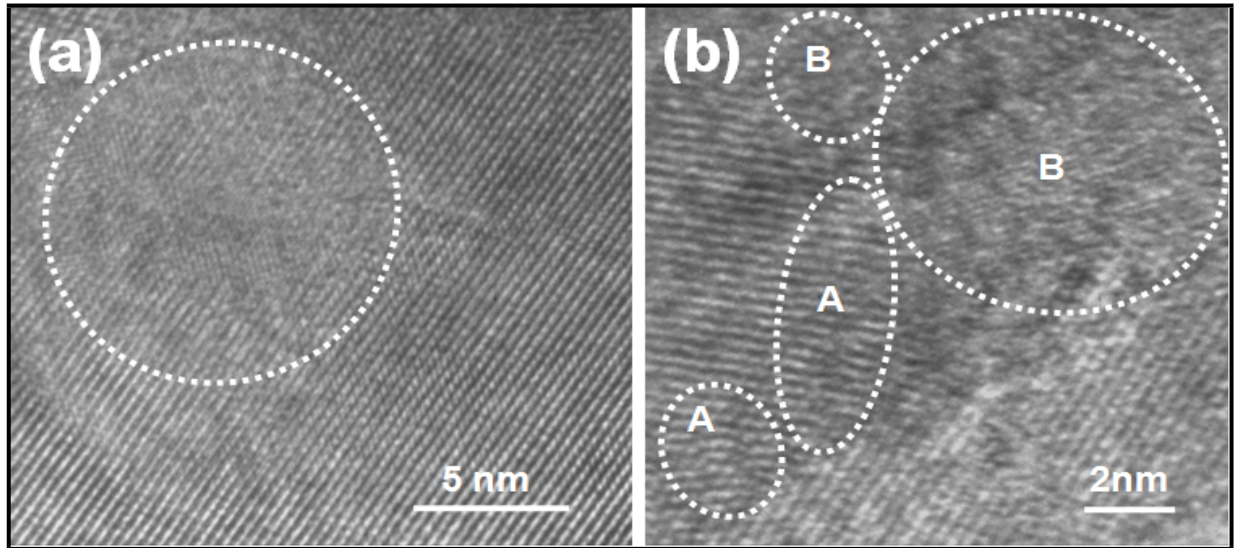

**Figure S1:** HRTEM atomic scale image of nanostructured Si<sub>80</sub>Ge<sub>20</sub> alloy showing (a) region with amorphous phase in a crystalline lattice (white dot line encircled) (b) region (A) comprising of a series of dislocations (edge-type) and also region (B) showing a mushy microstructure of amorphous & crystalline phases.

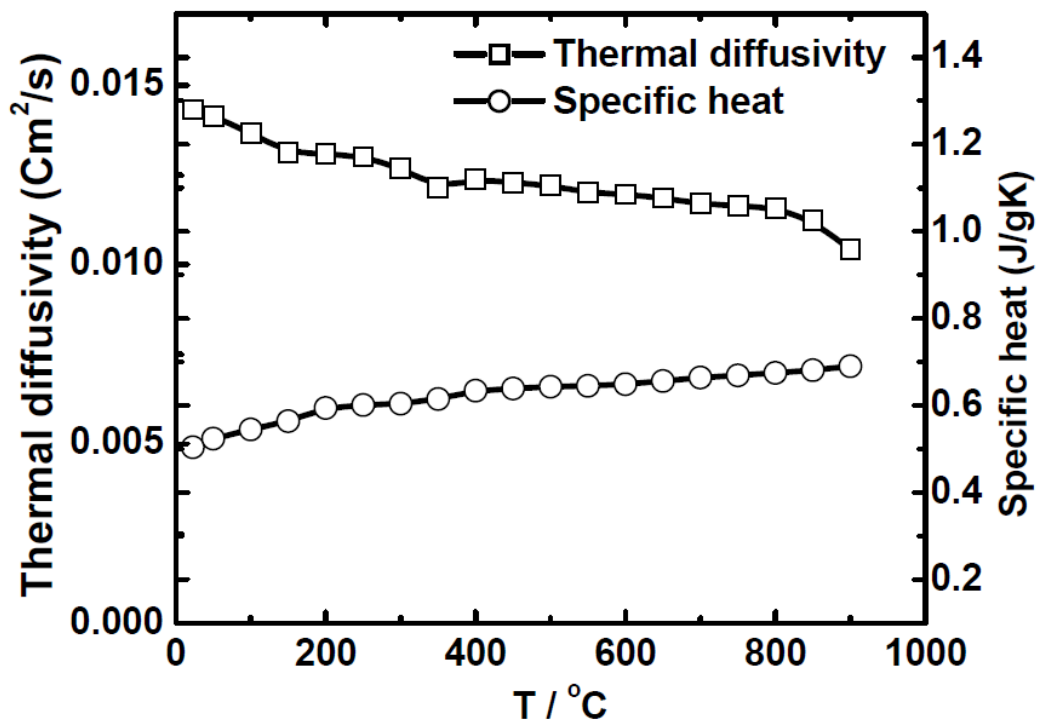

**Figure S2:** Temperature dependence of thermal conductivity ( $\kappa$ ), calculated from the measured thermal diffusivity and specific heat capacity.

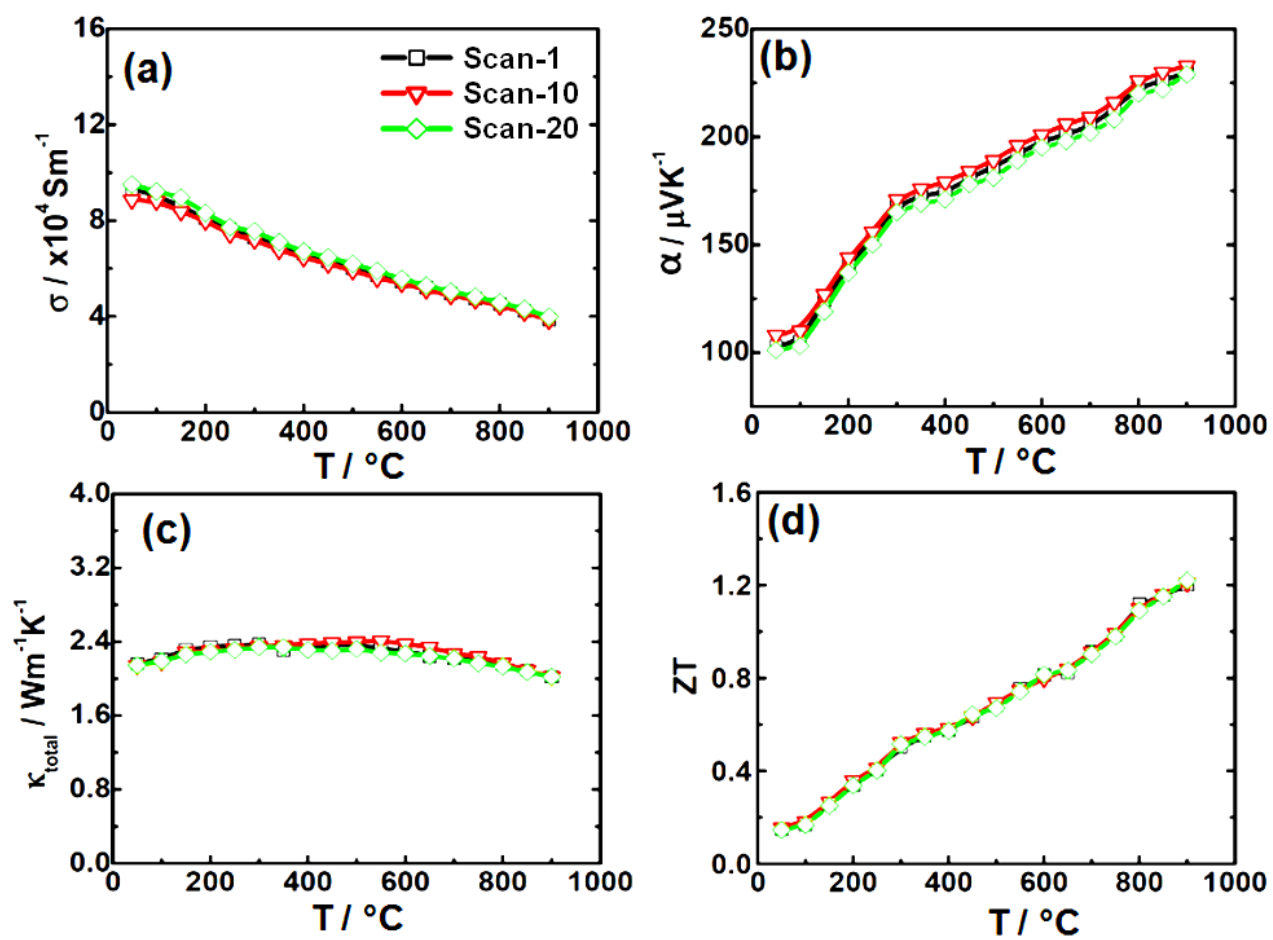

**Figure S3:** (Color online) Temperature dependence electrical transport properties of nanostructured *SiGe* for different thermal cycles (a) Electrical conductivity (b) Seebeck coefficient (c) Thermal conductivity (d) ZT
